# Supplementary material for: Population structure of Helicobacter pylori among ethnic groups in Malaysia: recent acquisition of the bacterium by the Malay population
Source: Springer Nature journal article supplement (doi:10.1186/1471-2180-9-126), 2009-06-19
Supplement: 12866_2008_797_MOESM4_ESM.pdf [file 12866_2008_797_MOESM4_ESM.pdf]

|               | <i>atpA</i> |   |   | <i>efp</i> |   |  | <i>mutY</i> |   |   | <i>trpC</i> |   |   |   |   |   |   |   |   | <i>urel</i> |   |   | <i>yphC</i> |   |   |   |   |   |   |
|---------------|-------------|---|---|------------|---|--|-------------|---|---|-------------|---|---|---|---|---|---|---|---|-------------|---|---|-------------|---|---|---|---|---|---|
|               | 2           | 3 |   | 3          | 3 |  | 1           | 3 | 3 | 3           | 1 | 1 | 3 | 3 | 3 | 3 | 3 | 3 | 1           | 2 | 2 | 2           | 1 | 1 | 3 |   |   |   |
|               | 6           | 2 | 1 | 2          | 6 |  | 5           | 1 | 4 | 8           | 8 | 8 | 4 | 9 | 1 | 2 | 2 | 3 | 4           | 4 | 1 | 2           | 5 | 7 | 8 | 5 | 7 | 9 |
|               | 9           | 5 | 8 | 8          | 6 |  | 1           | 6 | 9 | 9           | 4 | 5 | 4 | 4 | 8 | 5 | 9 | 6 | 0           | 3 | 7 | 1           | 8 | 6 | 1 | 9 | 8 | 6 |
| Consensus     | A           | T | A | G          | C |  | C           | C | C | C           | C | A | G | C | A | C | C | C | A           | A | C | G           | T | C | A | T | C | A |
| Sub-consensus | G           | . | C | .          | T |  | T           | T | T | .           | . | . | T | G | . | . | . | . | .           | . | A | .           | . | . | . | . | . |   |
| L106          | G           | . | . | .          | T |  | T           | T | T | .           | . | . | T | G | . | . | . | . | .           | . | A | .           | . | . | . | . | . |   |
| L107          | G           | . | . | .          | T |  | T           | T | T | .           | . | . | T | G | . | . | . | . | .           | . | A | .           | . | . | . | . | . |   |
| L113          | G           | . | C | .          | T |  | T           | T | T | .           | . | . | T | G | . | . | . | . | .           | . | A | .           | . | . | . | . | . |   |
| L12           | G           | . | . | .          | T |  | T           | T | T | .           | . | . | T | G | . | . | . | . | .           | . | A | .           | . | . | . | . | . |   |
| L120          | G           | . | C | .          | T |  | T           | T | T | .           | . | . | T | G | . | . | . | . | .           | . | A | .           | . | G | . | . | . |   |
| L122          | G           | . | . | A          | . |  | T           | T | T | .           | . | . | T | G | . | . | . | . | .           | . | A | .           | . | . | . | . | . |   |
| L125          | G           | . | C | .          | T |  | T           | T | T | .           | . | . | T | G | . | . | . | . | .           | . | A | .           | T | . | . | . | . |   |
| L126          | G           | . | . | .          | T |  | T           | T | T | .           | . | . | T | G | . | . | . | . | .           | . | A | .           | . | . | . | . | . |   |
| L128          | G           | . | C | .          | T |  | T           | T | T | .           | . | . | T | G | . | . | . | . | .           | . | A | .           | T | . | . | . | . |   |
| L13           | G           | . | C | .          | T |  | T           | T | T | .           | . | . | T | G | . | . | . | . | .           | . | A | .           | . | . | . | . | T |   |
| L144          | G           | . | C | .          | T |  | T           | T | T | .           | . | . | T | G | . | . | . | . | .           | . | A | .           | . | . | . | . | T |   |
| L15           | G           | . | C | .          | T |  | T           | T | T | .           | . | . | T | G | . | . | . | . | .           | . | A | .           | . | . | . | . | T |   |
| L164          | G           | . | C | .          | T |  | T           | T | T | .           | . | . | T | G | . | . | . | . | .           | . | A | .           | . | . | . | . | T |   |
| L20           | .           | . | C | .          | T |  | T           | T | T | .           | . | . | T | G | . | . | T | C | .           | T | . | .           | . | . | . | . |   |   |
| L21           | .           | . | C | .          | T |  | T           | T | T | .           | . | . | T | G | . | . | . | . | .           | . | A | .           | . | . | . | . | . |   |
| L22           | G           | . | . | .          | T |  | T           | T | T | .           | . | . | T | G | . | . | . | . | .           | . | A | .           | . | . | . | . | . |   |
| L23           | G           | . | C | .          | T |  | T           | T | T | .           | . | . | T | G | . | . | . | . | .           | . | A | .           | . | . | . | . | . |   |
| L25           | .           | . | C | .          | T |  | T           | T | T | .           | . | . | T | G | . | . | . | . | .           | . | T | .           | T | . | . | . | . |   |
| L27           | .           | . | C | .          | T |  | T           | T | T | .           | . | . | T | G | . | . | . | . | .           | . | A | .           | . | . | . | . | . |   |
| L28           | .           | . | C | .          | T |  | T           | T | T | .           | . | . | T | G | . | . | . | . | .           | . | A | .           | . | . | . | . | . |   |
| L30           | G           | . | . | .          | T |  | T           | T | T | .           | . | . | T | G | . | . | . | . | .           | . | A | .           | . | . | . | . | . |   |
| L32           | G           | . | . | .          | T |  | T           | T | T | .           | . | . | T | G | . | . | . | . | .           | . | A | .           | . | . | . | . | . |   |
| L36           | G           | . | . | .          | T |  | T           | T | T | .           | . | . | T | G | . | . | . | . | .           | . | A | .           | . | . | . | . | . |   |
| L37           | G           | . | C | A          | . |  | T           | T | T | .           | . | . | T | G | . | . | . | . | .           | . | T | .           | T | . | . | . | T |   |
| L39           | G           | . | C | .          | T |  | T           | T | T | .           | . | . | T | G | . | . | . | . | .           | . | A | .           | . | . | . | . | . |   |
| L4            | G           | . | C | .          | T |  | T           | T | T | .           | . | . | T | G | . | . | . | . | .           | . | A | .           | . | . | . | . | . |   |
| L45           | .           | . | C | .          | T |  | T           | T | T | .           | . | . | T | G | . | . | . | . | .           | . | A | .           | . | . | . | . | . |   |
| L52           | .           | . | C | .          | T |  | T           | T | T | .           | . | . | T | G | . | . | . | . | .           | . | A | .           | . | . | . | . | . |   |
| L57           | G           | . | C | .          | T |  | T           | T | T | .           | . | . | T | G | . | . | T | C | .           | T | A | .           | G | . | . | . |   |   |
| L6            | G           | . | C | A          | T |  | T           | T | T | .           | . | . | T | G | . | . | . | . | .           | . | A | .           | . | . | . | . | . |   |
| L67           | G           | . | C | .          | T |  | T           | T | T | .           | . | . | T | G | . | . | . | . | .           | . | A | .           | . | . | . | . | . |   |
| L7            | G           | . | C | .          | T |  | T           | T | T | .           | . | . | T | G | . | . | . | . | .           | . | A | .           | . | . | . | . | . |   |
| L71           | G           | . | C | .          | T |  | T           | T | T | .           | . | . | T | G | . | . | . | . | .           | . | A | .           | . | . | . | . | T |   |
| L72           | G           | . | C | .          | T |  | T           | T | T | .           | . | . | T | G | . | . | . | . | .           | . | A | .           | . | . | . | . | . |   |
| L74           | G           | . | C | A          | . |  | T           | T | T | .           | . | . | T | G | . | . | . | . | .           | . | A | .           | . | . | . | . | T |   |
| L79           | G           | . | . | .          | T |  | T           | T | T | .           | . | . | T | G | . | . | . | . | .           | . | A | .           | T | G | T | G | . |   |
| L83           | G           | . | . | .          | T |  | T           | T | T | .           | . | . | T | G | . | . | . | . | .           | . | C | T           | . | . | . | . | . |   |
| L90           | .           | C | . | .          | T |  | T           | T | T | .           | . | . | T | G | . | . | . | . | .           | . | A | .           | . | . | . | . | . |   |
| L98           | G           | . | C | A          | . |  | T           | T | T | .           | . | . | T | G | . | . | . | . | .           | . | T | A           | . | . | . | . | . |   |
| Sub-consensus | .           | C | . | A          | . |  | T           | T | T | .           | T | G | A | . | T | A | T | G | C           | T | . | C           | T | G | C | T | G |   |
| FD543i        | .           | . | . | .          | T |  | T           | T | T | .           | T | G | A | . | T | A | T | G | C           | T | . | C           | T | G | C | T | G |   |
| FD584i        | .           | C | . | A          | . |  | T           | T | T | .           | T | G | A | . | T | A | T | G | C           | T | A | C           | T | G | . | . | G |   |
| FD541i        | .           | C | . | A          | . |  | T           | T | T | .           | T | G | A | . | T | A | T | G | C           | T | . | C           | . | G | . | T | G |   |
| FD604i        | .           | C | . | A          | . |  | T           | T | T | .           | T | G | A | . | T | A | T | G | C           | T | . | C           | T | G | . | . | G |   |
| FD589m        | .           | C | . | A          | . |  | T           | T | T | .           | T | G | A | . | T | A | T | G | C           | T | A | C           | T | G | . | . | G |   |
| GC014m        | .           | . | . | .          | T |  | T           | T | T | .           | T | G | A | . | T | A | T | G | C           | T | A | .           | . | G | . | . | G |   |
| FD607i        | G           | C | . | T          | . |  | T           | T | T | .           | T | G | A | . | T | A | T | G | C           | T | . | C           | . | G | C | T | G |   |
| FD703m        | .           | . | . | .          | T |  | T           | T | T | .           | T | G | A | . | T | A | T | G | C           | T | . | C           | T | G | . | T | G |   |
| FD535i        | .           | . | . | .          | T |  | T           | T | T | .           | T | G | A | . | T | A | T | G | C           | T | . | C           | T | G | . | T | G |   |
| FD719m        | .           | . | . | A          | . |  | T           | T | T | .           | T | G | A | . | T | A | T | G | C           | T | . | C           | . | G | . | . | G |   |
| FD575i        | .           | C | . | A          | . |  | T           | T | T | .           | T | G | A | . | T | A | T | G | C           | T | A | C           | . | G | . | . | G |   |
| FD608i        | .           | C | . | A          | . |  | T           | T | T | .           | T | G | A | . | T | A | T | G | C           | T | . | C           | . | G | . | . | G |   |
| FD662m        | .           | C | . | T          | . |  | T           | T | T | .           | T | G | A | . | T | A | T | G | C           | T | . | C           | T | G | C | . | G |   |
| FD619i        | .           | C | . | .          | T |  | T           | T | T | .           | T | G | A | . | T | A | T | G | C           | T | . | C           | T | G | C | . | G |   |
| FD418i        | .           | C | . | T          | . |  | T           | T | T | .           | T | G | A | . | T | A | T | G | C           | T | . | C           | T | G | . | . | G |   |
| FD520i        | G           | C | C | T          | . |  | T           | T | T | .           | T | G | A | . | T | A | T | G | C           | T | . | C           | . | G | . | . | G |   |
| FD546i        | G           | . | . | A          | . |  | T           | T | T | .           | T | G | A | . | T | A | T | G | C           | T | . | C           | T | G | C | . | G |   |
| FD725m        | .           | . | . | A          | . |  | T           | T | T | .           | T | G | A | . | T | A | T | G | C           | T | A | C           | . | G | C | T | G |   |
| FD477m        | .           | . | . | A          | . |  | T           | T | T | .           | T | G | A | . | T | A | T | G | C           | T | . | C           | T | G | . | . | G |   |
| FD556i        | G           | C | . | A          | . |  | T           | T | T | .           | T | G | A | . | T | A | T | G | C           | T | . | C           | T | G | . | T | G |   |
| FD585i        | .           | . | . | A          | . |  | T           | T | T | .           | T | G | A | . | T | A | T | G | C           | T | . | C           | . | G | . | . | G |   |
| FD710m        | .           | C | . | A          | . |  | T           | T | T | .           | T | G | A | . | T | A | T | G | C           | T | . | C           | . | G | C | T | G |   |
| FD574i        | G           | C | . | A          | . |  | T           | T | T | .           | T | G | A | . | T | A | T | G | C           | T | . | C           | . | G | . | . | G |   |
| FD511i        | .           | C | . | T          | . |  | T           | T | T | .           | T | G | A | . | T | A | T | G | C           | T | . | C           | . | G | C | . | G |   |
| FD509i        | .           | C | . | .          | T |  | T           | T | T | .           | T | G | A | . | T | A | T | G | C           | T | . | C           | T | G | . | . | G |   |
| FD430i        | .           | C | . | A          | . |  | T           | T | T | .           | T | G | A | . | T | A | T | G | C           | T | . | C           | . | G | . | . | G |   |
| FD528i        | .           | C | C | A          | . |  | T           | T | T | .           | T | G | A | . | T | A | T | G | C           | T | . | C           | T | G | C | T | G |   |
| FD483i        | .           | C | C | A          | . |  | T           | T | T | .           | T | G | A | . | T | A | T | G | C           | T | . | C           | T | G | . | . | G |   |
| FD423i        | .           | C | . | T          | . |  | T           | T | T | .           | T | G | A | . | T | A | T | G | C           | T | A | .           | . | G | . | . | G |   |
| FD517i        | .           | C | . | A          | . |  | T           | T | T | .           | T | G | A | . | T | A | T | G | C           | T | . | C           | T | G | C | . | G |   |
| FD711m        | .           | C | . | A          | . |  | T           | T | T | .           | T | G | A | . | T | A | T | G | C           | T | . | C           | T | G | . | . | G |   |
| FD533i        | .           | C | . | A          | . |  | T           | T | T | .           | T | G | A | . | T | A | T | G | C           | T | . | C           | T | G | . | . | G |   |
| H1414         | .           | . | . | .          | T |  | T           | T | T | .           | T | G | A | . | T | A | T | G | C           | T | . | C           | . | G | C | . | G |   |
| H1419         | .           | . | . | T          | . |  | T           | T | T | .           | T | G | A | . | T | A | T | G | C           | T | A | .           | . | G | C | . | G |   |
| re7006        | G           | . | . | A          | . |  | T           | T | T | .           | T | G | A | . | T | A | T | G | C           | T | . | C           | T | G | . | . | G |   |
