# Supplementary figures and images for: Population structure of Helicobacter pylori among ethnic groups in Malaysia: recent acquisition of the bacterium by the Malay population
Source: Springer Nature journal article supplement (doi:10.1186/1471-2180-9-126), 2009-06-19

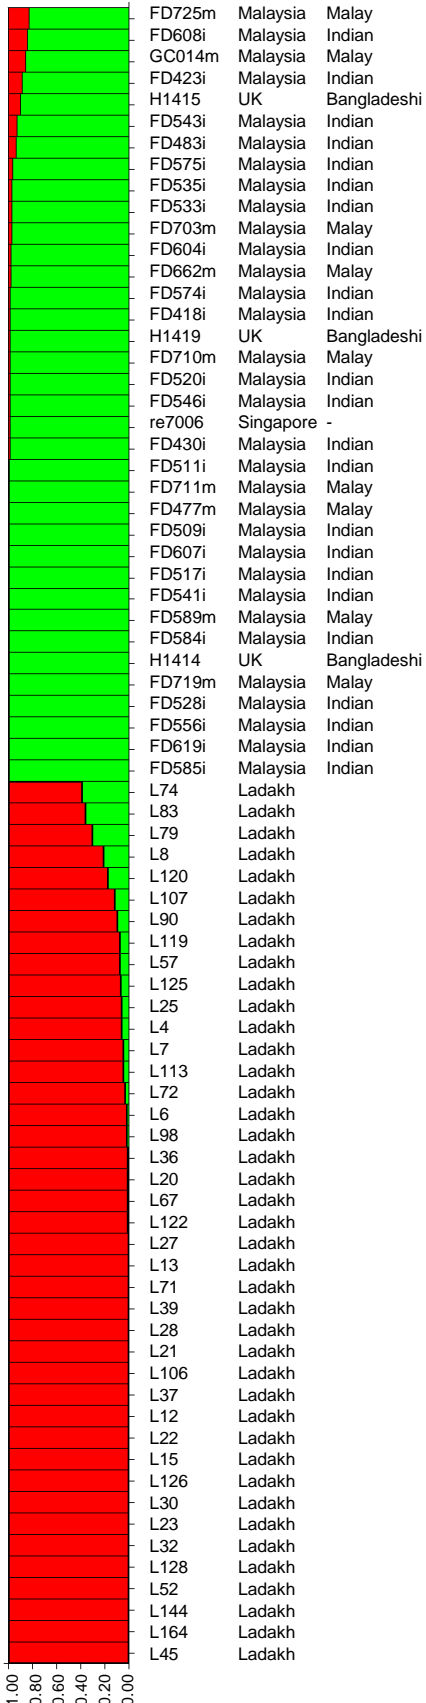

Supplement: 12866_2008_797_MOESM3_ESM.pdf [file 12866_2008_797_MOESM3_ESM.pdf]
